# Supplementary material for: HER2 regulates HIF-2α and drives an increased hypoxic response in breast cancer
Source: PubMed Central journal article supplement (PMC6343358; doi:10.1186/s13058-019-1097-0), 2019-01-22
Supplement: 13058_2019_1097_MOESM1_ESM.pdf [file 13058_2019_1097_MOESM1_ESM.pdf]

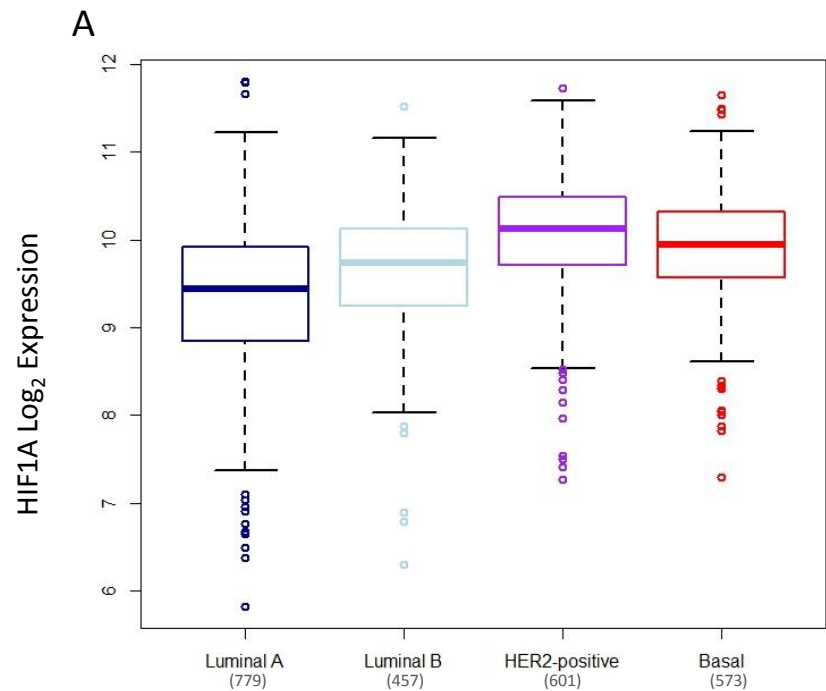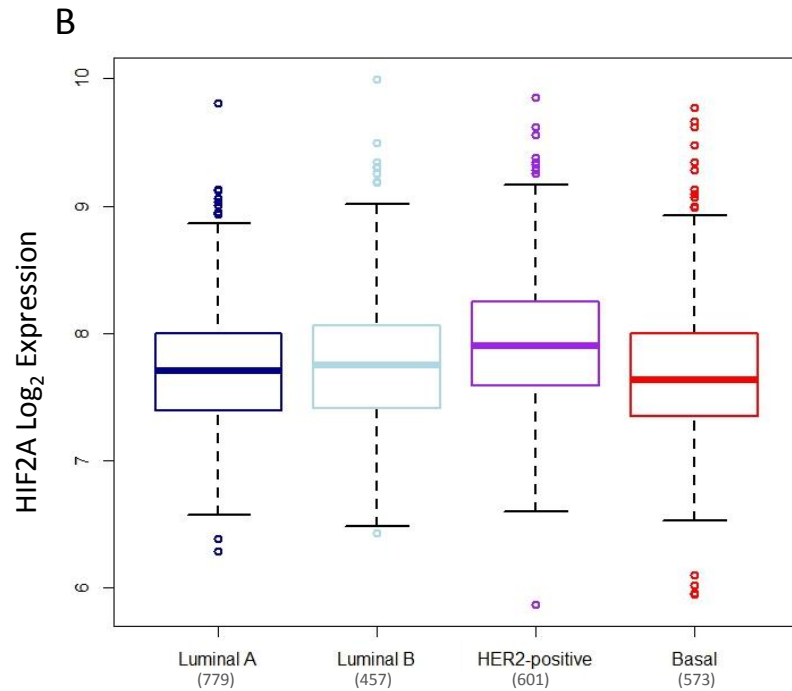

HIF1a

|                         | p adj     |
|-------------------------|-----------|
| Luminal B-Luminal A     | 0.0000000 |
| HER2-positive-Luminal A | 0.0000000 |
| Basal-Luminal A         | 0.0000000 |
| HER2-positive-Luminal B | 0.0000000 |
| Basal-Luminal B         | 0.0000000 |
| Basal-HER2-positive     | 0.0043644 |

HIF2a

|                         | p adj     |
|-------------------------|-----------|
| Luminal B-Luminal A     | 0.3168259 |
| HER2-positive-Luminal A | 0.0000000 |
| Basal-Luminal A         | 0.9273067 |
| HER2-positive-Luminal B | 0.0000002 |
| Basal-Luminal B         | 0.1379610 |
| Basal-HER2-positive     | 0.0000000 |
