# Supplementary material for: HER2 regulates HIF-2α and drives an increased hypoxic response in breast cancer
Source: PubMed Central journal article supplement (PMC6343358; doi:10.1186/s13058-019-1097-0), 2019-01-22

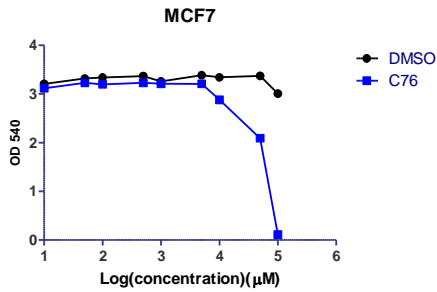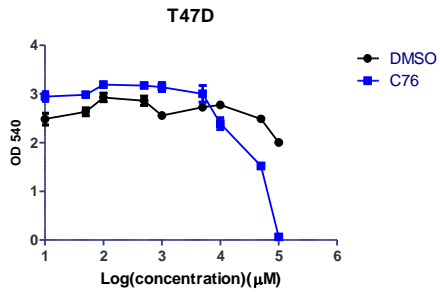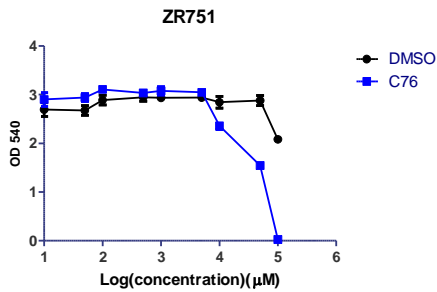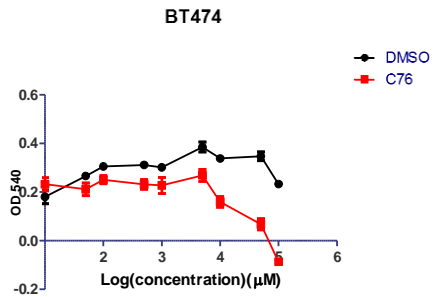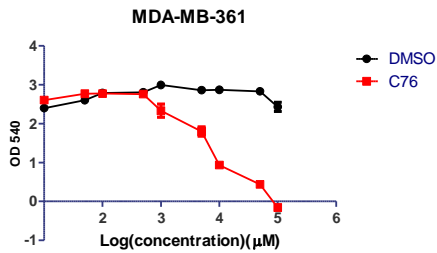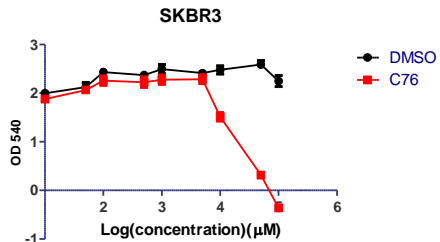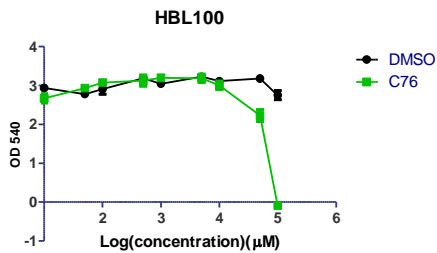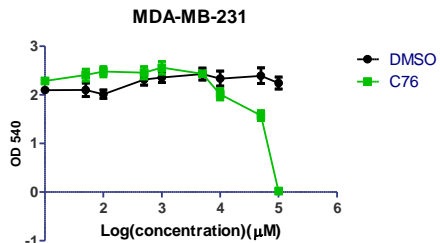

Supplement: 13058_2019_1097_MOESM5_ESM.pdf [file 13058_2019_1097_MOESM5_ESM.pdf]
