# Supplementary material for: HER2 regulates HIF-2α and drives an increased hypoxic response in breast cancer
Source: Springer Nature journal article supplement (doi:10.1186/s13058-019-1097-0), 2019-01-22

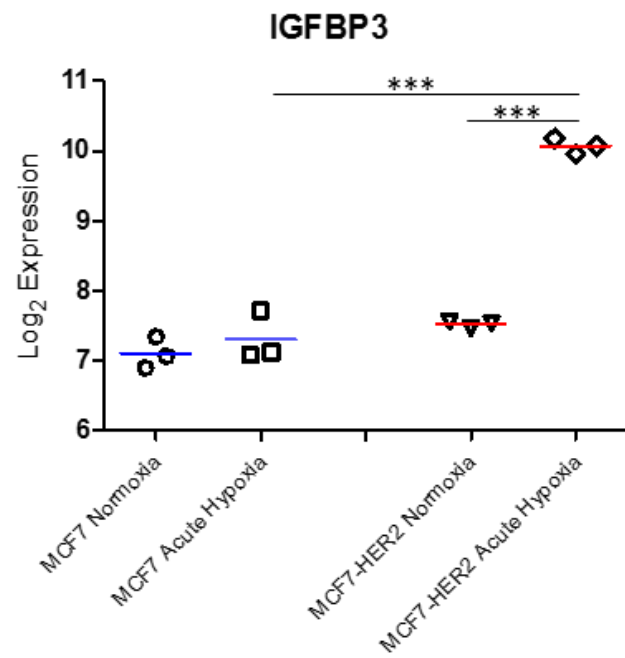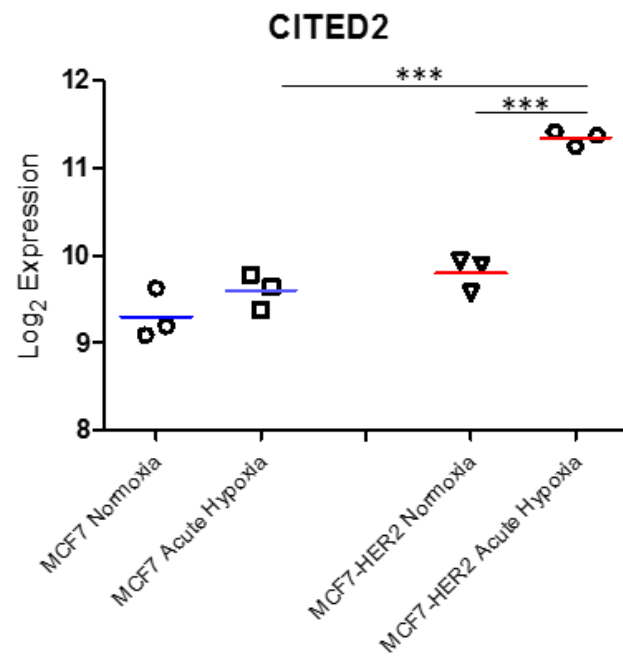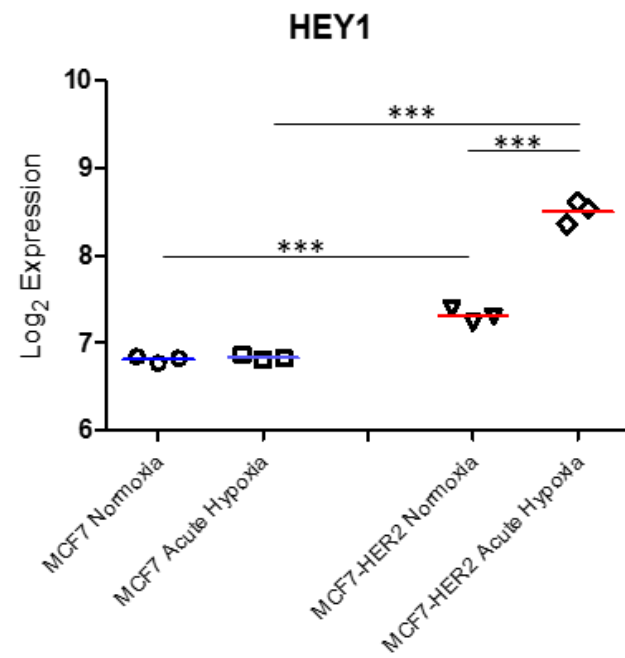

Supplement: MOESM4 [file 16412778]
